# Supplementary figures and images for: Icariin-Loaded TiO2 Nanotubes for Regulation of the Bioactivity of Bone Marrow Cells
Source: Hindawi journal article supplement (doi:10.1155/2018/1810846), 2018-01-01

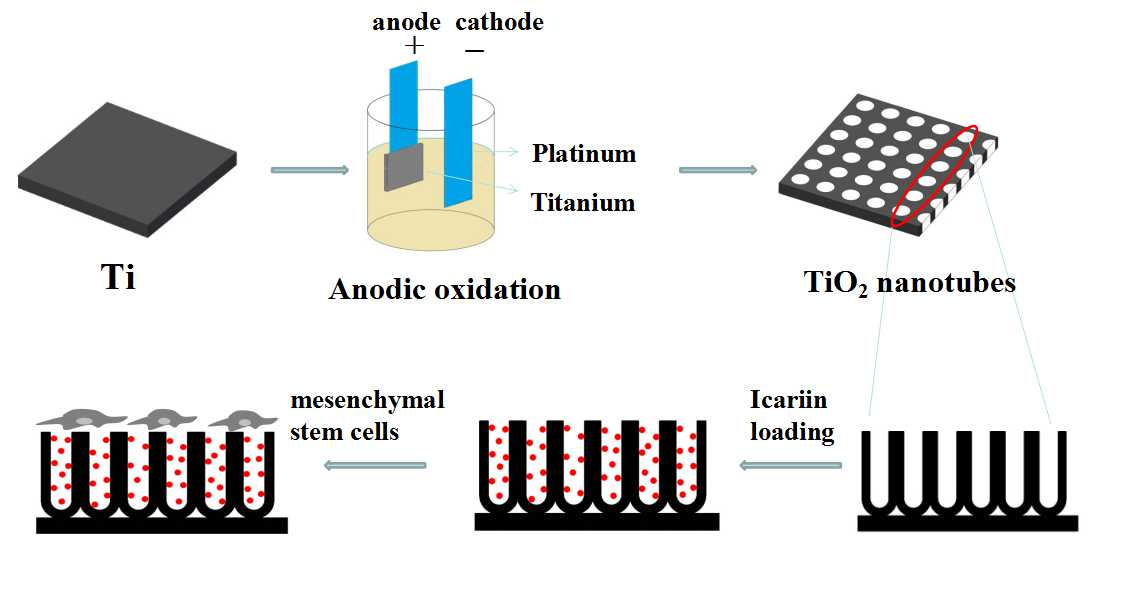

Supplement: f1 [file 1810846.f1.doc]
